# Supplementary material for: Sunken Riches: Ascomycete Diversity in the Western Mediterranean Coast through Direct Plating and Flocculation, and Description of Four New Taxa
Source: MDPI journal article supplement (doi:10.3390/jof10040281), 2024-04-11
Supplement: s1 [file s1]

**Table S1:** Collection details of the strains detected in marine sediments and GenBank accession numbers of the barcodes used for identification.

| Molecular ID                        | Family                   | FMR   | Beach       | Depth | Agar media | ITS      | LSU      | TUB      | TEF      | RPB2     | SSU |
|-------------------------------------|--------------------------|-------|-------------|-------|------------|----------|----------|----------|----------|----------|-----|
| <i>Acremonium egyptiacum</i>        | <i>Bionectriaceae</i>    | 19979 | Arrabassada | 13    | DRBC       | PP273903 |          |          | PP392587 |          |     |
| <i>Acrophialophora jodhpurensis</i> | <i>Chaetomiaceae</i>     | 19999 | Arrabassada | 20    | SWMEA3%    | PP273913 |          |          |          |          |     |
|                                     |                          | 20081 | Arrabassada | 20    | SWMEA3%    | PP273920 |          |          |          | PP412563 |     |
| <i>Amphichorda littoralis</i>       | <i>Bionectriaceae</i>    | 19404 | Miracle     | 20    | SWMEA3%    | OQ942924 | OQ943161 |          |          |          |     |
|                                     |                          | 19611 | Miracle     | 20    | DRBC       | OQ942926 | OQ943163 |          |          |          |     |
|                                     |                          | 20066 | Arrabassada | 27    | SWMEA3%    | PP344593 | PP342585 |          |          |          |     |
|                                     |                          | 20067 | Arrabassada | 20    | SWMEA3%    | OQ942927 | OQ943164 |          |          |          |     |
|                                     |                          | 20149 | Arrabassada | 20    | SWMEA3%    | OQ942928 | OQ943165 |          |          |          |     |
|                                     |                          | 20291 | Arrabassada | 20    | SWMEA3%    | PP344594 | PP342586 |          |          |          |     |
|                                     |                          | 20368 | Arrabassada | 20    | SWMEA3%    | PP344595 | PP342587 |          |          |          |     |
| <i>Aphanoascus crassitunicatus</i>  | <i>Onygenaceae</i>       | 20176 | Arrabassada | 13    | PDA+C      | PP273949 |          |          |          |          |     |
| <i>Aphanoascus fulvescens</i>       | <i>Onygenaceae</i>       | 19946 | Arrabassada | 27    | SWMEA3%    | PP273899 |          |          |          |          |     |
|                                     |                          | 20116 | Arrabassada | 27    | SWMEA3%    | PP273928 |          |          |          |          |     |
| <i>Arachnomyces sp.</i>             | <i>Arachnomycetaceae</i> | 20163 | Arrabassada | 27    | SWMEA3%    | PP273940 |          |          |          |          |     |
| <i>Arthrographis curvata</i>        | <i>Eremomycetaceae</i>   | 19557 | Miracle     | 20    | DRBC       | PP273869 |          |          |          |          |     |
|                                     |                          | 20084 | Arrabassada | 20    | SWMEA3%    | PP273921 |          |          |          |          |     |
| <i>Arthrographis kalrae</i>         | <i>Eremomycetaceae</i>   | 20074 | Arrabassada | 20    | PDA+C      | PP273917 |          |          |          |          |     |
| <i>Aspergillus calidoustus</i>      | <i>Aspergillaceae</i>    | 20172 | Arrabassada | 20    | DRBC       |          |          | PP431576 |          |          |     |
| <i>Aspergillus chevalieri</i>       | <i>Aspergillaceae</i>    | 19829 | Miracle     | 27    | SWMEA3%    |          |          | PP431577 |          |          |     |
|                                     |                          | 19831 | Miracle     | 13    | DRBC       |          |          | PP431578 |          |          |     |
|                                     |                          | 20122 | Miracle     | 27    | DRBC       |          |          | PP431579 |          |          |     |
|                                     |                          | 20123 | Miracle     | 20    | DRBC       |          |          | PP431580 |          |          |     |
|                                     |                          | 19837 | Miracle     | 20    | SWMEA3%    |          |          | PP431581 |          |          |     |
|                                     |                          | 19838 | Miracle     | 20    | SWMEA3%    |          |          | PP431582 |          |          |     |
| <i>Aspergillus intermedius</i>      | <i>Aspergillaceae</i>    | 20167 | Miracle     | 20    | SWMEA3%    |          |          | PP431583 |          |          |     |
| <i>Aspergillus montevidensis</i>    | <i>Aspergillaceae</i>    | 20076 | Arrabassada | 20    | SWMEA3%    | PP273919 |          | PP431584 |          |          |     |
| <i>Aspergillus pseudoglaucus</i>    | <i>Aspergillaceae</i>    | 19830 | Miracle     | 27    | SWMEA3%    |          |          | PP431585 |          |          |     |
|                                     |                          | 20121 | Miracle     | 27    | SWMEA3%    |          |          | PP431586 |          |          |     |
|                                     |                          | 19832 | Miracle     | 13    | SWMEA3%    |          |          | PP431587 |          |          |     |
| <i>Aspergillus quadrilineatus</i>   | <i>Aspergillaceae</i>    | 19833 | Miracle     | 27    | DRBC       |          |          | PP431588 |          |          |     |
|                                     |                          | 19467 | Miracle     | 20    | DRBC       |          |          | PP431589 |          |          |     |
| <i>Aspergillus terreus</i>          | <i>Aspergillaceae</i>    | 19949 | Arrabassada | 20    | SWMEA3%    |          |          | PP431590 |          |          |     |

|                                      |                     |       |             |    |         |          |          |          |          |          |          |
|--------------------------------------|---------------------|-------|-------------|----|---------|----------|----------|----------|----------|----------|----------|
|                                      |                     | 20001 | Arrabassada | 20 | DRBC    |          |          | PP431591 |          |          |          |
| <i>Botryotrichum spirotrichum</i>    | Chaetomiaceae       | 19980 | Arrabassada | 27 | SWMEA3% |          |          |          |          | PP412564 |          |
| <i>Byssoonygena ceratinophila</i>    | Onygenaceae         | 19558 | Miracle     | 13 | DRBC    | PP273870 | PP342588 |          |          |          |          |
| <i>Chaetomium</i> sp.-1              | Chaetomiaceae       | 19623 | Miracle     | 27 | DRBC    | PP340477 |          |          |          |          |          |
|                                      |                     | 19939 | Arrabassada | 13 | DRBC    | PP273895 |          |          |          |          |          |
| <i>Chantransiopsis cf. decumbens</i> | Incertae sedis      | 19986 | Arrabassada | 27 | SWMEA3% | PP273906 | PP342589 |          |          |          | PP340176 |
| <i>Cladophialophora inmundata</i>    | Herpotrichiellaceae | 20179 | Miracle     | 20 | DRBC    | PP273952 |          |          |          |          |          |
| <i>Cladophialophora saturnica</i>    | Herpotrichiellaceae | 19605 | Miracle     | 13 | PDA+C   | PP273876 |          |          |          |          |          |
| <i>Cladosporium cladosporioides</i>  | Cladosporiaceae     | 20182 | Miracle     | 20 | DRBC    |          |          |          | PP386376 |          |          |
|                                      |                     | 20181 | Miracle     | 20 | SWMEA3% |          |          |          | PP386377 |          |          |
| <i>Cladosporium</i> sp.              | Cladosporiaceae     | 20180 | Miracle     | 6  | SWMEA3% |          |          |          | PP386383 |          |          |
| <i>Collariella pachypodioides</i>    | Chaetomiaceae       | 19944 | Arrabassada | 27 | DRBC    | PP273897 |          |          |          | PP412565 |          |
| <i>Cucurbitodhis pithyophila</i>     | Cucurbitariaceae    | 19846 | Miracle     | 20 | DRBC    |          |          |          |          | PP412566 |          |
| <i>Emericellopsis maritima</i>       | Bionectriaceae      | 19565 | Miracle     | 6  | SWMEA3% | PP273874 |          |          |          |          |          |
|                                      |                     | 20087 | Miracle     | 27 | PDA+C   | PP273923 | PP342590 |          | PP392588 | PP412567 |          |
|                                      |                     | 20164 | Arrabassada | 27 | SWMEA3% | PP273941 |          |          | PP392589 | PP412568 |          |
| <i>Emericellopsis microspora</i>     | Bionectriaceae      | 19396 | Miracle     | 27 | SWMEA3% | PP273851 |          |          |          |          |          |
| <i>Emericellopsis minima</i>         | Bionectriaceae      | 19461 | Miracle     | 20 | DRBC    | PP273853 | PP342591 |          | PP392590 |          |          |
| <i>Emericellopsis salmosynnemata</i> | Bionectriaceae      | 19609 | Miracle     | 6  | DRBC    | PP273880 |          |          |          | PP412581 |          |
|                                      |                     | 20160 | Arrabassada | 27 | SWMEA3% | PP273938 |          |          |          | PP412569 |          |
| <i>Exophiala littoralis</i>          | Herpotrichiellaceae | 19606 | Miracle     | 6  | DRBC    | PP273877 | PP342592 | PP431592 |          |          |          |
|                                      |                     | 19607 | Miracle     | 6  | DRBC    | PP273878 | PP342593 | PP431593 |          |          |          |
| <i>Exophiala xenobiotica</i>         | Herpotrichiellaceae | 19604 | Miracle     | 27 | SWMEA3% | PP273875 |          |          |          |          |          |
| <i>Fusarium falciforme</i>           | Nectriaceae         | 20152 | Arrabassada | 13 | SWMEA3% |          |          |          | PP386378 |          |          |
| <i>Fusarium solani</i>               | Nectriaceae         | 19854 | Arrabassada | 27 | SWMEA3% |          |          |          | PP386379 |          |          |
| <i>Gamsia columbina</i>              | Microascaceae       | 19393 | Miracle     | 27 | DRBC    | PP273849 |          |          |          |          |          |
|                                      |                     | 19556 | Miracle     | 13 | SWMEA3% | PP273868 |          |          |          |          |          |
|                                      |                     | 19853 | Arrabassada | 20 | PDA+C   | PP273894 |          |          |          |          |          |
|                                      |                     | 19991 | Arrabassada | 20 | PDA+C   | PP273910 |          |          |          |          |          |
|                                      |                     | 20175 | Arrabassada | 13 | PDA+C   | PP273948 |          |          |          |          |          |
| <i>Gliomastix masseei</i>            | Bionectriaceae      | 19948 | Arrabassada | 20 | SWMEA3% | PP273901 |          |          |          |          |          |
| <i>Gymnascella dankaliensis</i>      | Gymnoascaceae       | 19625 | Miracle     | 27 | PDA+C   | PP273888 |          |          |          |          |          |
|                                      |                     | 19616 | Miracle     | 20 | SWMEA3% | PP273883 | PP342594 |          |          |          |          |
|                                      |                     | 20162 | Arrabassada | 27 | PDA+C   | PP273939 |          |          |          |          |          |
| <i>Gymnoascoideus</i> sp.            | Gymnoascaceae       | 19992 | Arrabassada | 27 | PDA+C   | PP273911 |          |          |          |          |          |

|                                        |                             |       |             |    |         |          |          |          |          |          |          |
|----------------------------------------|-----------------------------|-------|-------------|----|---------|----------|----------|----------|----------|----------|----------|
| <i>Gymnoascus longitrichus</i>         | <i>Gymnoascaceae</i>        | 19624 | Miracle     | 20 | PDA+C   | PP273887 |          |          |          |          |          |
| <i>Gymnoascus reessii</i>              | <i>Gymnoascaceae</i>        | 19395 | Miracle     | 27 | SWMEA3% | PP273850 |          |          |          |          |          |
| <i>Lophotrichus fimeti</i>             | <i>Microascaceae</i>        | 20072 | Arrabassada | 20 | SWMEA3% | PP273915 | PP342595 |          |          |          |          |
| <i>Malbranchea ostraviensis</i>        | <i>Malbrancheaceae</i>      | 20173 | Arrabassada | 27 | DRBC    | PP273946 |          |          |          |          |          |
| <i>Malbranchea zuffiana</i>            | <i>Malbrancheaceae</i>      | 20086 | Miracle     | 20 | PDA+C   | PP273922 | PP342596 |          |          |          |          |
| <i>Malbranchea</i> sp.-1               | <i>Malbrancheaceae</i>      | 19564 | Miracle     | 27 | DRBC    | PP344596 |          |          |          |          |          |
|                                        |                             | 20150 | Arrabassada | 27 | PDA+C   | PP344597 |          |          |          |          |          |
| <i>Malbranchea</i> sp.-2               | <i>Malbrancheaceae</i>      | 19403 | Miracle     | 27 | SWMEA3% | PP344598 |          |          |          |          |          |
| <i>Malbranchea</i> sp.-3               | <i>Malbrancheaceae</i>      | 20151 | Arrabassada | 27 | PDA+C   | PP344599 |          |          |          |          |          |
| <i>Microascus trigonosporus</i>        | <i>Microascaceae</i>        | 19945 | Arrabassada | 27 | SWMEA3% | PP273898 |          | PP431597 |          |          |          |
| <i>Narasimhella hialinospora</i>       | <i>Gymnoascaceae</i>        | 20283 | Arrabassada | 20 | DRBC    | PP273953 |          |          |          |          |          |
| <i>Narasimhella poonensis</i>          | <i>Gymnoascaceae</i>        | 19620 | Miracle     | 27 | SWMEA3% | PP273885 | PP342597 |          |          |          |          |
|                                        |                             | 19613 | Miracle     | 27 | SWMEA3% | PP273882 | PP342598 |          |          |          |          |
|                                        |                             | 19621 | Miracle     | 27 | SWMEA3% | PP273886 | PP342599 |          |          |          |          |
|                                        |                             | 19978 | Arrabassada | 27 | PDA+C   | PP273902 |          |          |          |          |          |
|                                        |                             | 20145 | Arrabassada | 27 | PDA+C   | PP273931 |          |          |          |          |          |
| <i>Nigrocephalum paracollariferum</i>  | <i>Plectosphaerellaceae</i> | 19852 | Arrabassada | 27 | SWMEA3% | PP273893 |          |          |          |          |          |
|                                        |                             | 20069 | Arrabassada | 20 | SWMEA3% | PP273914 | PP342600 |          | PP392591 | PP412570 |          |
|                                        |                             | 20174 | Arrabassada | 13 | SWMEA3% | PP273947 | PP342601 |          | PP392592 | PP412571 |          |
| Onygenal no ID-1                       | ? ( <i>Onygenales</i> )     | 19619 | Miracle     | 27 | DRBC    |          |          |          |          |          | PP459576 |
| Onygenal no ID-2                       | ? ( <i>Onygenales</i> )     | 19614 | Miracle     | 13 | SWMEA3% |          |          |          |          |          | PP459575 |
| <i>Paraphaeosphaeria</i> sp.           | <i>Didymosphaeriaceae</i>   | 20158 | Arrabassada | 6  | DRBC    | PP273937 | PP342602 |          |          |          |          |
| <i>Parapyrenis maritima</i>            | <i>Requienellaceae</i>      | 19985 | Arrabassada | 27 | SWMEA3% | PP273905 |          |          |          |          |          |
| <i>Parasarocladium wereldwijnianum</i> | <i>Sarocladiaceae</i>       | 20177 | Miracle     | 27 | SWMEA3% | PP273950 | PP342603 |          |          |          |          |
|                                        |                             | 19608 | Miracle     | 27 | SWMEA3% | PP273879 |          |          |          |          |          |
|                                        |                             | 20147 | Arrabassada | 27 | SWMEA3% | PP273933 |          |          |          |          |          |
|                                        |                             | 20146 | Arrabassada | 27 | SWMEA3% | PP273932 |          |          |          |          |          |
| <i>Parathielavia kuwaitensis</i>       | <i>Chaetomiaceae</i>        | 19555 | Miracle     | 27 | SWMEA3% | PP273867 |          |          |          | PP412572 |          |
| <i>Penicillium antarcticum</i>         | <i>Aspergillaceae</i>       | 20433 | Arrabassada | 27 | SWMEA3% |          |          | PP431598 |          |          |          |
|                                        |                             | 20434 | Arrabassada | 20 | DRBC    |          |          | PP431599 |          |          |          |
|                                        |                             | 20171 | Arrabassada | 27 | PDA+C   |          |          | PP431600 |          |          |          |
| <i>Penicillium brevicompactum</i>      | <i>Aspergillaceae</i>       | 19401 | Miracle     | 27 | SWMEA3% |          |          | PP431601 |          |          |          |
| <i>Penicillium canescens</i>           | <i>Aspergillaceae</i>       | 20002 | Arrabassada | 27 | SWMEA3% |          |          | PP431602 |          |          |          |
| <i>Penicillium chrysogenum</i>         | <i>Aspergillaceae</i>       | 20125 | Miracle     | 13 | DRBC    |          |          | PP431603 |          |          |          |
| <i>Penicillium citreosulfuratum</i>    | <i>Aspergillaceae</i>       | 19943 | Arrabassada | 27 | SWMEA3% |          |          | PP431604 |          |          |          |

|                                        |                           |       |             |    |         |          |          |          |          |          |  |
|----------------------------------------|---------------------------|-------|-------------|----|---------|----------|----------|----------|----------|----------|--|
| <i>Penicillium egyptiacum</i>          | <i>Aspergillaceae</i>     | 20119 | Miracle     | 27 | SWMEA3% |          |          | PP431605 |          |          |  |
|                                        |                           | 20120 | Miracle     | 27 | SWMEA3% |          |          | PP431606 |          |          |  |
|                                        |                           | 19463 | Miracle     | 27 | DRBC    |          |          | PP431607 |          |          |  |
|                                        |                           | 19835 | Miracle     | 27 | SWMEA3% |          |          | PP431608 |          |          |  |
|                                        |                           | 19836 | Miracle     | 20 | DRBC    |          |          | PP431609 |          |          |  |
|                                        |                           | 20124 | Miracle     | 6  | DRBC    |          |          | PP431610 |          | PP412573 |  |
| <i>Penicillium nalgiovense</i>         | <i>Aspergillaceae</i>     | 19987 | Arrabassada | 20 | SWMEA3% |          |          | PP431611 |          |          |  |
|                                        |                           | 20090 | Arrabassada | 20 | SWMEA3% |          |          | PP431612 |          |          |  |
| <i>Penicillium rubens</i>              | <i>Aspergillaceae</i>     | 19402 | Miracle     | 27 | SWMEA3% |          |          | PP431613 |          |          |  |
|                                        |                           | 19405 | Miracle     | 20 | SWMEA3% |          |          | PP431614 |          |          |  |
|                                        |                           | 19406 | Miracle     | 6  | SWMEA3% | PP273852 |          | PP431615 |          |          |  |
| <i>Preussia procaviae</i>              | <i>Sporormiaceae</i>      | 19839 | Miracle     | 27 | SWMEA3% | PP273890 |          |          |          |          |  |
| <i>Preussia similis</i>                | <i>Sporormiaceae</i>      | 19464 | Miracle     | 27 | SWMEA3% | PP273854 | PP342604 |          |          |          |  |
| <i>Preussia</i> sp.-1                  | <i>Sporormiaceae</i>      | 19850 | Miracle     | 20 | DRBC    | PP344600 | PP342618 |          |          |          |  |
| <i>Preussia</i> sp.-2                  | <i>Sporormiaceae</i>      | 19618 | Miracle     | 27 | DRBC    | PP344601 | PP342619 |          |          |          |  |
|                                        |                           | 20127 | Miracle     | 27 | DRBC    | PP344602 | PP342620 |          |          |          |  |
|                                        |                           | 20161 | Arrabassada | 20 | SWMEA3% | PP344603 | PP342621 |          |          |          |  |
| <i>Preussia</i> sp.-3                  | <i>Sporormiaceae</i>      | 19842 | Miracle     | 20 | SWMEA3% | PP344604 | PP342622 |          |          |          |  |
| <i>Pseudeurotium desertorum</i>        | <i>Pseudeurotiaceae</i>   | 19617 | Miracle     | 20 | SWMEA3% | PP273884 | PP342605 |          |          |          |  |
| <i>Pseudeurotium ovale</i>             | <i>Pseudeurotiaceae</i>   | 19554 | Miracle     | 20 | DRBC    | PP273866 |          |          |          |          |  |
|                                        |                           | 19553 | Miracle     | 20 | DRBC    | PP273865 |          |          |          |          |  |
|                                        |                           | 19984 | Miracle     | 20 | DRBC    | PP273904 |          |          |          |          |  |
|                                        |                           | 20165 | Arrabassada | 27 | DRBC    | PP273942 |          |          |          |          |  |
|                                        |                           | 20075 | Arrabassada | 20 | SWMEA3% | PP273918 |          |          |          |          |  |
|                                        |                           | 20155 | Arrabassada | 27 | SWMEA3% | PP273936 |          |          |          |          |  |
|                                        |                           | 20153 | Arrabassada | 27 | SWMEA3% | PP273934 |          |          |          |          |  |
|                                        |                           | 20285 | Arrabassada | 27 | SWMEA3% | PP273954 |          |          |          |          |  |
|                                        |                           | 20117 | Arrabassada | 20 | DRBC    | PP273929 |          |          |          |          |  |
| <i>Pseudogymnoascus pannorum</i>       | <i>Pseudeurotiaceae</i>   | 19465 | Miracle     | 27 | PDA+C   | PP273855 |          |          |          |          |  |
| <i>Pseudohumicola</i> sp.              | <i>Chaetomiaceae</i>      | 20111 | Arrabassada | 13 | SWMEA3% | PP273925 |          |          |          |          |  |
| <i>Queenslandipenidiella verrucosa</i> | <i>Teratosphaeriaceae</i> | 19473 | Miracle     | 20 | DRBC    | PP273856 | PP342606 |          |          |          |  |
|                                        |                           | 19474 | Miracle     | 20 | PDA+C   | PP273857 | PP342607 |          |          |          |  |
|                                        |                           | 19475 | Miracle     | 20 | PDA+C   | PP273858 | PP342608 |          |          |          |  |
|                                        |                           | 19476 | Miracle     | 20 | PDA+C   | PP273859 | PP342609 |          |          |          |  |
|                                        |                           | 19477 | Miracle     | 13 | DRBC    | PP273860 | PP342610 | PP431594 | PP386380 |          |  |

|                                       |                         |       |             |    |         |          |          |          |          |          |  |
|---------------------------------------|-------------------------|-------|-------------|----|---------|----------|----------|----------|----------|----------|--|
|                                       |                         | 19478 | Miracle     | 13 | SWMEA3% | PP273861 | PP342611 |          | PP386381 |          |  |
|                                       |                         | 19479 | Miracle     | 13 | PDA+C   | PP273862 | PP342612 |          | PP386382 |          |  |
|                                       |                         | 19480 | Miracle     | 13 | PDA+C   | PP273863 |          |          |          |          |  |
|                                       |                         | 19481 | Miracle     | 6  | PDA+C   | PP273864 |          |          |          |          |  |
| <i>Roussoella padinae</i>             | <i>Thyridariaceae</i>   | 19988 | Arrabassada | 27 | SWMEA3% | PP273907 |          |          |          | PP412574 |  |
|                                       |                         | 19989 | Arrabassada | 6  | SWMEA3% | PP273908 |          |          |          | PP412575 |  |
|                                       |                         | 20148 | Arrabassada | 13 | DRBC    |          |          |          |          | PP412576 |  |
| <i>Scedosporium apiospermum</i>       | <i>Microascaceae</i>    | 19940 | Arrabassada | 20 | PDA+C   | PP273896 |          | PP431616 |          |          |  |
| <i>Scedosporium boydii</i>            | <i>Microascaceae</i>    | 19562 | Miracle     | 27 | DRBC    | PP273873 |          | PP431617 |          |          |  |
|                                       |                         | 20369 | Arrabassada | 27 | DRBC    | PP273958 |          |          |          |          |  |
|                                       |                         | 20112 | Arrabassada | 27 | DRBC    | PP273926 |          | PP431618 |          |          |  |
|                                       |                         | 20169 | Arrabassada | 27 | SWMEA3% | PP273944 |          | PP431619 |          |          |  |
| <i>Scedosporium dehoogii</i>          | <i>Microascaceae</i>    | 19561 | Miracle     | 27 | SWMEA3% | PP273872 |          | PP431620 |          |          |  |
|                                       |                         | 19612 | Miracle     | 20 | SWMEA3% | PP273881 |          | PP431621 |          |          |  |
| <i>Schizochlamydosporiella marina</i> | <i>Schizotheciaceae</i> | 20114 | Arrabassada | 27 | DRBC    | PP273927 | PP342613 | PP431595 |          | PP412577 |  |
| <i>Schizothecium carpinicola</i>      | <i>Schizotheciaceae</i> | 20154 | Arrabassada | 27 | DRBC    | PP273935 |          |          |          |          |  |
| <i>Scytalidium lignicola</i>          | <i>Incertae sedis</i>   | 19849 | Miracle     | 27 | SWMEA3% | PP273892 |          |          |          |          |  |
|                                       |                         | 20170 | Arrabassada | 27 | SWMEA3% | PP273945 |          |          |          |          |  |
| <i>Sporothrix</i> sp.                 | <i>Ophiostomataceae</i> | 20288 | Arrabassada | 27 | PDA+C   | PP273955 |          |          |          |          |  |
| <i>Stachybotrys chlorohalonatus</i>   | <i>Stachybotryaceae</i> | 19626 | Miracle     | 20 | SWMEA3% | PP273889 |          |          |          |          |  |
|                                       |                         | 19982 | Arrabassada | 27 | SWMEA3% | PP340478 |          |          |          |          |  |
|                                       |                         | 19947 | Arrabassada | 27 | PDA+C   | PP273900 |          |          |          |          |  |
|                                       |                         | 20370 | Arrabassada | 27 | SWMEA3% | PP273959 |          |          |          |          |  |
| <i>Stolonocarpus</i> sp.              | <i>Chaetomiaceae</i>    | 19559 | Miracle     | 27 | SWMEA3% | PP273871 | PP342614 |          |          |          |  |
|                                       |                         | 20178 | Miracle     | 27 | SWMEA3% | PP273951 | PP342615 |          |          |          |  |
| <i>Subuliphorum camptosporum</i>      | <i>Clavicipitaceae</i>  | 20073 | Miracle     | 13 | PDA+C   | PP273916 | PP342616 |          |          |          |  |
| <i>Talaromyces assiutensis</i>        | <i>Trichocomaceae</i>   | 20085 | Arrabassada | 13 | DRBC    | PP341503 |          |          |          |          |  |
|                                       |                         | 20156 | Arrabassada | 20 | DRBC    |          |          | PP431622 |          |          |  |
| <i>Talaromyces liani</i>              | <i>Trichocomaceae</i>   | 20157 | Miracle     | 27 | DRBC    |          |          | PP431623 |          |          |  |
|                                       |                         | 20089 | Miracle     | 13 | DRBC    |          |          | PP431624 |          |          |  |
|                                       |                         | 20432 | Arrabassada | 27 | DRBC    |          |          | PP431625 |          |          |  |
|                                       |                         | 20290 | Arrabassada | 13 | DRBC    |          |          | PP431626 |          |          |  |
| <i>Talaromyces trachispermum</i>      | <i>Trichocomaceae</i>   | 19981 | Arrabassada | 20 | DRBC    |          |          | PP431627 |          |          |  |
| <i>Talaromyces ucrainicus</i>         | <i>Trichocomaceae</i>   | 19394 | Miracle     | 27 | DRBC    |          |          | PP431628 |          |          |  |
|                                       |                         | 19855 | Arrabassada | 13 | DRBC    |          |          | PP431629 |          |          |  |

|                                   |                          |              |                    |    |         |          |          |          |  |          |  |
|-----------------------------------|--------------------------|--------------|--------------------|----|---------|----------|----------|----------|--|----------|--|
| <i>Talaromyces wortmannii</i>     | <i>Trichocomaceae</i>    | <b>19397</b> | <b>Miracle</b>     | 20 | DRBC    |          |          | PP431630 |  |          |  |
|                                   |                          | <b>19398</b> | <b>Miracle</b>     | 20 | DRBC    |          |          | PP431631 |  |          |  |
|                                   |                          | <b>19399</b> | <b>Miracle</b>     | 13 | DRBC    |          |          | PP431632 |  |          |  |
|                                   |                          | <b>19400</b> | <b>Miracle</b>     | 27 | DRBC    |          |          | PP431633 |  |          |  |
| <i>Talaromyces</i> sp.-1          | <i>Trichocomaceae</i>    | <b>19610</b> | <b>Miracle</b>     | 20 | DRBC    |          |          | PP431634 |  | PP412578 |  |
|                                   |                          | <b>20079</b> | <b>Arrabassada</b> | 13 | DRBC    |          |          | PP431635 |  |          |  |
| <i>Triadelphia moubasheri</i>     | <i>Triadelpiaceae</i>    | <b>19840</b> | <b>Miracle</b>     | 6  | SWMEA3% | PP273891 |          |          |  |          |  |
| <i>Verruciconidia verruculosa</i> | <i>Bionectriaceae</i>    | <b>20166</b> | <b>Arrabassada</b> | 27 | SWMEA3% | PP273943 |          |          |  | PP412579 |  |
| <i>Waltergamsia fusidioides</i>   | <i>Bionectriaceae</i>    | <b>20110</b> | <b>Arrabassada</b> | 6  | SWMEA3% | PP273924 |          |          |  | PP412580 |  |
|                                   |                          | <b>20289</b> | <b>Arrabassada</b> | 6  | SWMEA3% | PP273956 |          |          |  |          |  |
|                                   |                          | <b>20292</b> | <b>Arrabassada</b> | 6  | SWMEA3% | PP273957 |          |          |  |          |  |
| <i>Westerdykella dispersa</i>     | <i>Sporormiaceae</i>     | <b>20118</b> | <b>Arrabassada</b> | 27 | SWMEA3% | PP273930 | PP342617 | PP431596 |  |          |  |
| <i>Zopfiella</i> sp.-1            | <i>Lasiosphaeriaceae</i> | <b>19995</b> | <b>Arrabassada</b> | 27 | SWMEA3% | PP273912 |          |          |  |          |  |
|                                   |                          | <b>19990</b> | <b>Arrabassada</b> | 27 | SWMEA3% | PP273909 |          |          |  |          |  |

**Table S2:** Accession numbers of the strains included in the phylogenetic analyses.

| Species                               | Strain number   | GenBank accession numbers |            |                |             | References |
|---------------------------------------|-----------------|---------------------------|------------|----------------|-------------|------------|
|                                       |                 | ITS                       | LSU        | <i>tef1</i> -a | <i>rpb2</i> |            |
| <i>Exophiala lamphunensis</i>         | CMU 404         | NR_184985                 | NA         | NA             | NA          | [101]      |
| <i>Exophiala xenobiotica</i>          | CBS 118157      | NR_111203                 |            | NA             | NA          | [102]      |
| <i>Exophiala saxicola</i>             | CMU 415         | NR_184987                 | NA         | NA             | NA          | [101]      |
| <i>Exophiala lapidea</i>              | CMU 409         | NR_184986                 | NA         | NA             | NA          | [101]      |
| <i>Exophiala campbellii</i>           | NCPF2274_T      | LT594703                  | LT594760   | NA             | NA          | [103]      |
|                                       | NCPG7936        | MN091928                  | MN091927   | NA             | NA          | [104]      |
| <i>Exophiala arunalokei</i>           | NCCPF106033     | MW724320                  | NA         | NA             | NA          | [105]      |
| <i>Exophiala italica</i>              | MFLUCC 16-0245  | KY496744                  | KY496723   | NA             | NA          | [106]      |
| <i>Exophiala hongkongensis</i>        | HKU 32          | NR_111671                 | NG_059264  | NA             | NA          | [102,65]   |
| <i>Exophiala polymorpha</i>           | CBS 138920      | KP070764                  | NG_059237  | NA             | NA          | [107]      |
| <i>Exophiala nishimurae</i>           | CBS 101538      | NR_137092                 | KX712351   | NA             | NA          | [65,108]   |
| <i>Exophiala spinifera</i>            | CBS 899.68      | NR_111131                 | Westerdijk | NA             | NA          | [102]      |
| <i>Exophiala exophialae</i>           | CBS 668.76_T    | NR_111130                 | NG_059252  | NA             | NA          | [102,108]  |
| <i>Exophiala spartinae</i>            | CBS 142672_T    | NR_174648                 | NA         | NA             | NA          | [109]      |
| <i>Exophiala jeanselmei</i>           | CBS 507.90_T    | AY156963                  | MH873915   | NA             | NA          | [61,110]   |
| <i>Exophiala oligosperma</i>          | CBS 725.88_T    | NR_111134                 | NG_059201  | NA             | NA          | [102,111]  |
|                                       | CBS 265.49_T    | MH856519                  | MH868049   | NA             | NA          | [110,112]  |
| <i>Exophiala pseudooligosperma</i>    | YMF 1.6741_T    | MW616557                  | MW616559   | NA             | NA          | [110]      |
| <i>Rhinocladiaella basitona</i>       | CBS 101460_T    | NR_111135                 | NG_057783  | NA             | NA          | [102,113]  |
| <i>Rhinocladiaella similis</i>        | PW3041          | LC158611                  | LC158635   | NA             | NA          | [13]       |
| <i>Exophiala bergeri</i>              | CBS 353.52_T    | MH857080                  | NG_059199  | NA             | NA          | [110,111]  |
| <i>Exophiala ellipsoidea</i>          | CGMCC 3.17348_T | NR_172238                 | KP347956   | NA             | NA          | [115]      |
| <i>Exophiala sideris</i>              | CBS 121818_T    | NR_111553                 | NA         | NA             | NA          | [102]      |
| <i>Exophiala capensis</i>             | CBS 128771_T    | NR_121493                 | MH876538   | NA             | NA          | [102,110]  |
| <i>Exohiala nigra</i>                 | CBS 535.94_T    | NR_154974                 | NG_059253  | NA             | NA          | [108,116]  |
| <i>Exophiala dehoogii</i>             | CBS 149779_T    | ON009858                  | ON009938   | NA             | NA          | [45]       |
| <i>Exophiala palmae</i>               | UPCB 86822_T    | NR_158414                 | NG_064428  | NA             | NA          | [117]      |
| <i>Nigrocephalum collariferum</i>     | CBS 124586_T    | MH863392                  | MH874911   | LR026486       | LR026193    | [46,110]   |
|                                       | CBS 124585      | FJ765365                  | LR025928   | LR026485       | LR026192    | [46,110]   |
| <i>Wallrothiella gmelinae</i>         | CBS 142520_T    | KY979753                  | KY979808   | NA             | NA          | [118]      |
| <i>Wallrothiella subiculosa</i>       | JCM 23118       | AB540576                  | AB540502   | NA             | NA          | [119]      |
| <i>Chlamydosporiella restricta</i>    | CBS 178.40_T    | MH856081                  | MH867572   | LR026395       | LR026122    | [46,110]   |
|                                       | CBS 119.97      | LR026691                  | LR025820   | LR026393       | LR026120    | [46]       |
| <i>Stachylidium bicolor</i>           | CBS 121802_T    | LR026834                  | LR025972   | LR026532       | NA          | [46]       |
| <i>Stachylidium pallidum</i>          | DAOMC 226658    | LR026838                  | GU180651   | LR026534       | LR026228    | [46,120]   |
|                                       | BCC 79031       | LR026835                  | LR025973   | LR026533       | LR026227    | [46]       |
| <i>Paramusicillium asperulatum</i>    | CBS 120158_T    | LR026792                  | LR025930   | LR026487       | LR026194    | [46]       |
| <i>Musicillium theobromae</i>         | CBS 968.72_T    | LR026773                  | LR025907   | LR026468       | LR026178    | [46]       |
|                                       | CBS 397.58      | LR026772                  | LR025906   | LR026467       | LR026177    | [46]       |
| <i>Musicillium eletariae</i>          | CBS 252.80_T    | LR026765                  | LR025899   | LR026462       | LR026172    | [46]       |
|                                       | CBS 110322      | LR026766                  | LR025900   | LR026463       | NA          | [46]       |
| <i>Musicillium tropicale</i>          | CBS 120009_T    | LR026783                  | LR025917   | LR026477       | LR026186    | [46]       |
|                                       | CBS 395.58      | LR026779                  | LR025913   | LR026474       | LR026182    | [46]       |
| <i>Phialoparvum bifurcatum</i>        | CBS 299.70B_T   | LR026793                  | LR025931   | LR026488       | LR026195    | [46]       |
| <i>Plectosphaerella cucumerina</i>    | CBS 137.33_T    | LR026797                  | LR025935   | LR026492       | LR026198    | [46]       |
| <i>Queenslandipenediella kurandae</i> | CBS 121715_T    | KF901538                  | KF901860   | NA             | NA          | [44]       |
| <i>Devriesia thermoturans</i>         | CBS 115878_T    | KF442506                  | NG_059078  | NA             | NA          | [121,122]  |
| <i>Devriesia tardicrescens</i>        | CBS 128770_T    | NR_137771                 | NG_059091  | NA             | NA          | [123]      |

|                                             |                  |           |           |    |          |           |
|---------------------------------------------|------------------|-----------|-----------|----|----------|-----------|
| <i>Baudoinia compniacensis</i>              | CBS 123032       | MH863266  | MH874790  | NA | NA       | [110]     |
| <i>Baudoinia antilliensis</i>               | UAMH 10810_T     | NR_153616 | NG_058686 | NA | NA       | [124]     |
| <i>Baudoinia orientalis</i>                 | UAMH 10814_T     | NR_153613 | KT186490  | NA | NA       | [124]     |
| <i>Apenidiella strumelloidea</i>            | CBS 114484_T     | MH862966  | KF937229  | NA | NA       | [44,110]  |
| <i>Apenidiella foetida</i>                  | FMR 17266        | NR_165516 | NG_067803 | NA | NA       | [125]     |
| <i>Oleoguttula mirabilis</i>                | CCFEE 5523_T     | NR_144974 | KF310031  | NA | NA       | [44]      |
| <i>Parapenidiella tasmaniensis</i>          | CBS 111687_T     | DQ267591  | KF901843  | NA | NA       | [44,126]  |
| <i>Parapenidiella pseudotasmaniensis</i>    | CBS 124991_T     | MH863440  | MH874943  | NA | NA       | [110]     |
| <i>Penidiella columbina</i>                 | CBS 486.80_T     | MH861288  | MH873053  | NA | NA       | [110]     |
| <i>Teratosphaeria fibrillosa</i>            | CBS 121707_T     | MH863138  | MH874689  | NA | NA       | [110]     |
| <i>Teratosphaeria macowanii</i>             | CBS 122901_T     | MH863257  | MH874781  | NA | NA       | [110]     |
| <i>Readeriella tasmanica</i>                | CBS 125002_T     | MH863448  | KF902116  | NA | NA       | [44,110]  |
| <i>Readeriella mirabilis</i>                | CBS 125000_T     | KF901549  | KF901871  | NA | NA       | [44]      |
| <i>Xenopenidiella rigidophora</i>           | CBS 314.95_T     | NR_175015 | MH874156  | NA | NA       | [110,121] |
| <i>Suberoteratosphaeria pseudosuberosa</i>  | CBS 118911_T     | KF901786  | KF902144  | NA | NA       | [44]      |
| <i>Suberoteratosphaeria suberosa</i>        | CBS 436.92_T     | KF901623  | KF901949  | NA | NA       | [44]      |
| <i>Phaeothecoidea eucalypti</i>             | CBS 120831_T     | KF901526  | KF901848  | NA | NA       | [44]      |
| <i>Pseudoteratosphaeria flexuosa</i>        | CBS 111012_T     | KF901755  | KF902110  | NA | NA       | [44]      |
| <i>Pseudoteratosphaeria perpendicularis</i> | CBS 118367_T     | KF901637  | KF901972  | NA | NA       | [44]      |
| <i>Myrtapenidiella eucalypti</i>            | CBS 123246_T     | KF901772  | KF902130  | NA | NA       | [44]      |
| <i>Myrtapenidiella tenuiramis</i>           | CBS 124993_T     | MH863441  | GQ852626  | NA | NA       | [110,127] |
| <i>Ramularia endophylla</i>                 | CBS 113265_T     | KF251220  | KF251723  | NA | NA       | [44]      |
| <i>Ramularia eucalypti</i>                  | CBS 120726_T     | KF901666  | KF902006  | NA | NA       | [44]      |
| <i>Zopfiella tardifaciens</i>               | CBS 670.82_T     | MK926855  | MK926855  | NA | MK876817 | [128]     |
| <i>Cercophora newfieldiana</i>              | SMH 3303         | NA        | AY780062  | NA | AY780167 | [129]     |
| <i>Cercophora thailandica</i>               | MFLUCC 12-0845_T | KU940139  | KU863127  | NA | KU940176 | [130]     |
| <i>Apodus deciduus</i>                      | CBS 506.70_T     | AY681199  | AY681165  | NA | NA       | [131]     |
| <i>Podospora intestinacea</i>               | CBS 113106       | AY999121  | AY999104  | NA | NA       | [132]     |
| <i>Arnimium cirriferum</i>                  | CBS 120041       | NA        | KF557673  | NA | NA       | [133]     |
| <i>Zopfiella erostrata</i>                  | CBS 255.71       | AY999133  | AY999110  | NA | NA       | [132]     |
| <i>Apiosordaria microcarpa</i>              | CBS 692.82_T     | MK926841  | MK926841  | NA | MK876803 | [128]     |
| <i>Immersiella caudata</i>                  | CBS 606.72       | AY999135  | AY999113  | NA | DQ368646 | [129,134] |
| <i>Amesia atrobrunnea</i>                   | CBS 379.66_T     | MH858833  | MH870470  | NA | KX976798 | [110,135] |
| <i>Triangularia bambusae</i>                | CBS 352.33_T     | MK926868  | MK926868  | NA | MK876830 | [128]     |
| <i>Zygopleurage zygospora</i>               | SMH 4219         | NA        | AY346306  | NA | NA       | [136]     |
| <i>Podospora bullata</i>                    | CBS 115576_T     | DQ166960  | MH874548  | NA | NA       | [110,137] |
| <i>Pseudoechria longicolis</i>              | CBS 368.52_T     | MK926847  | MK926847  | NA | MK876809 | [128]     |
| <i>Pseudoechria prolifica</i>               | CBS 250.71_T     | MK926848  | MK926848  | NA | MK876810 | [128]     |
| <i>Pseudoechria decidua</i>                 | CBS 254.71_T     | MK926842  | MK926842  | NA | MK876804 | [128]     |
| <i>Rinaldiella pentagonospora</i>           | CBS 132344_T     | MH866007  | KP981442  | NA | KP981625 | [47,110]  |
| <i>Morinagamycetes vermicularis</i>         | CBS 303.81_T     | MT904879  | KP981427  | NA | KP981609 | [138]     |
| <i>Immersiella caudata</i>                  | SMH 3298         | NA        | AY436407  | NA | AY780161 | [129,134] |
| <i>Immersiella immersa</i>                  | SMH 4104         | NA        | AY436409  | NA | AY780181 | [129,134] |
| <i>Jugulospora rotula</i>                   | CBS 110112       | NA        | KP981434  | NA | KP981617 | [47]      |
| <i>Jugulospora carbonaria</i>               | ATCC 34567       | NA        | AY346302  | NA | AY780196 | [129,136] |
| <i>Cercophora mirabilis</i>                 | CBS 120402       | MT784128  | KP981429  | NA | KP981611 | [47]      |
| <i>Lundqvistomyces tanzaniensis</i>         | TRTC 51981_T     | MH862260  | AY780081  | NA | AY780197 | [110,129] |
| <i>Lundqvistomyces karachiensis</i>         | CBS 657.74_T     | MK926850  | KP981447  | NA | KP981630 | [47,128]  |
| <i>Schizothecium curvisporum</i>            | ATCC 36709       | NA        | AY346300  | NA | AY780192 | [132]     |
| <i>Schizothecium selenosporum</i>           | CBS 109403_T     | MK926849  | MK926849  | NA | MK876811 | [128]     |
| <i>Schizothecium inaequale</i>              | CBS 356.49_T     | MK926846  | MK926846  | NA | MK876808 | [128]     |



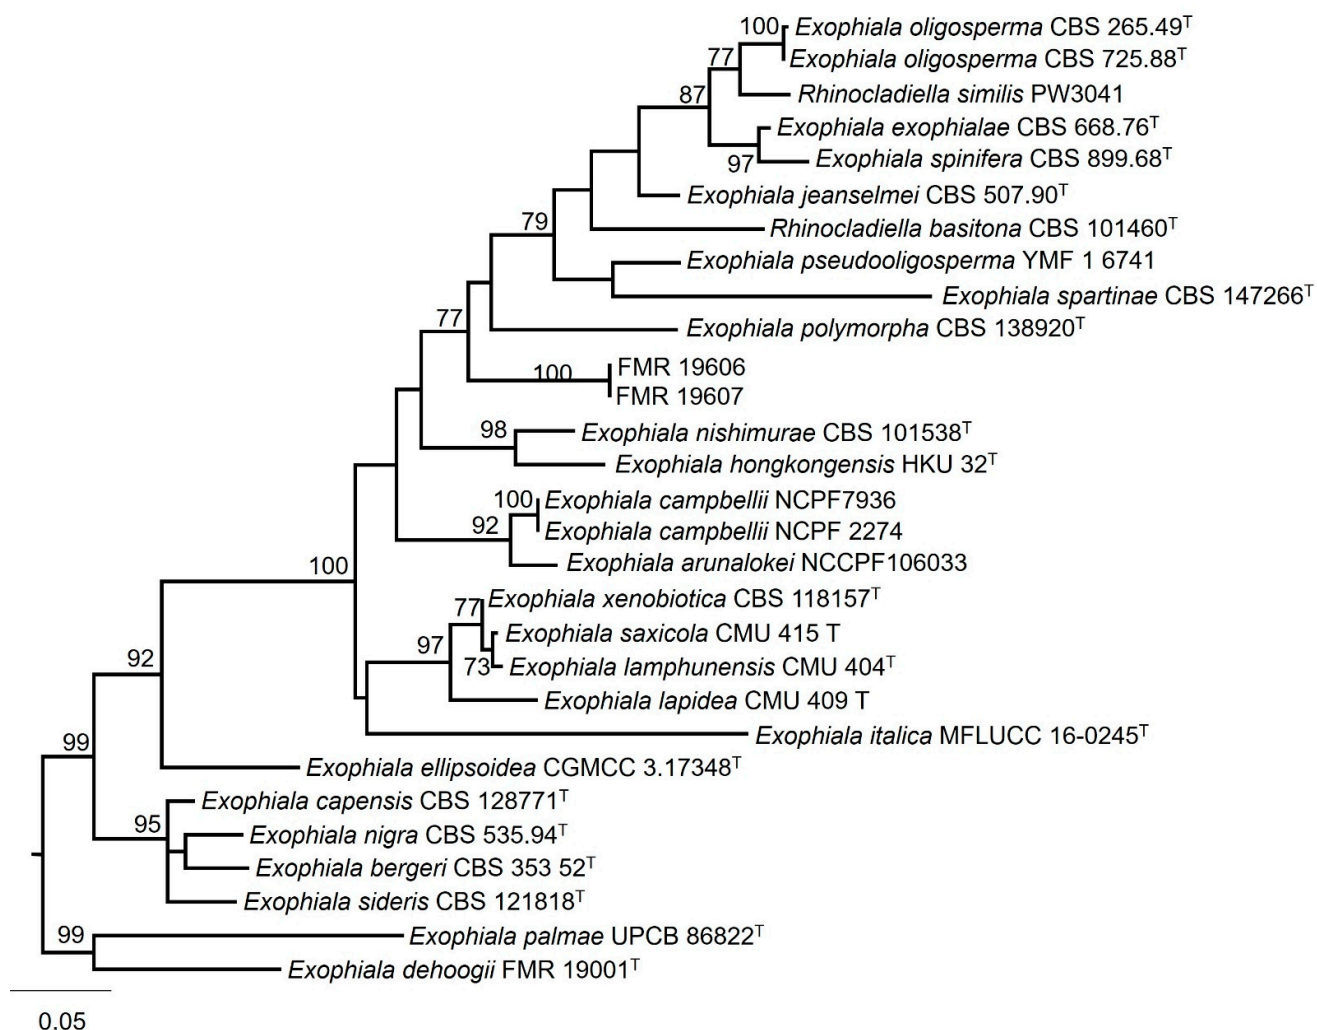

Figure S1: RaxML phylogenetic tree representing the individual ITS alignment of the *Exophiala jeanselmei* clade.

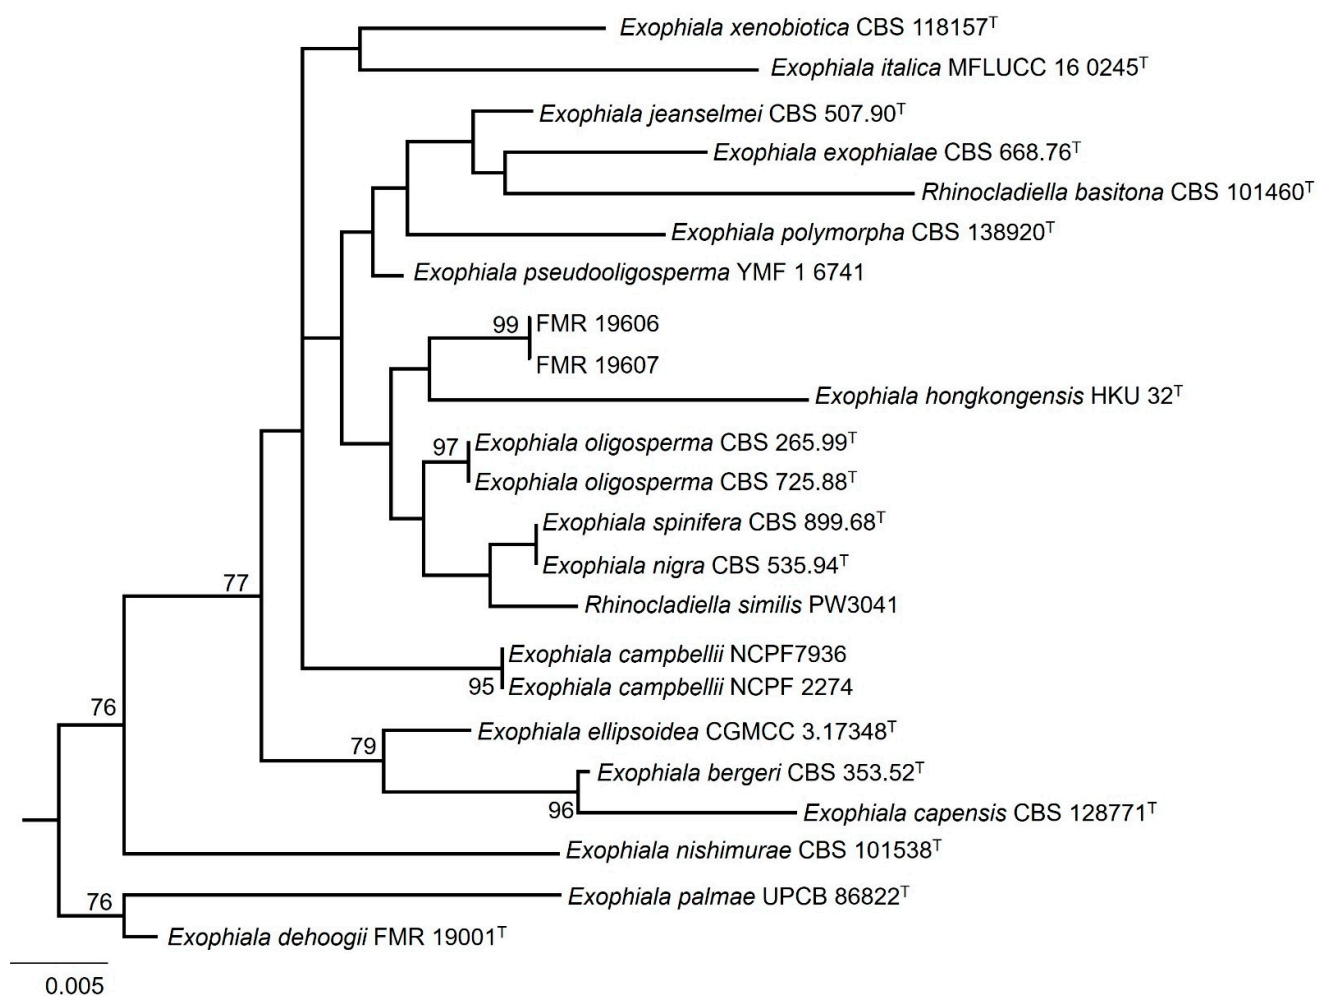

Figure S2: RaxML phylogenetic tree representing the individual LSU alignment of the *Exophiala jeanselmei* clade.

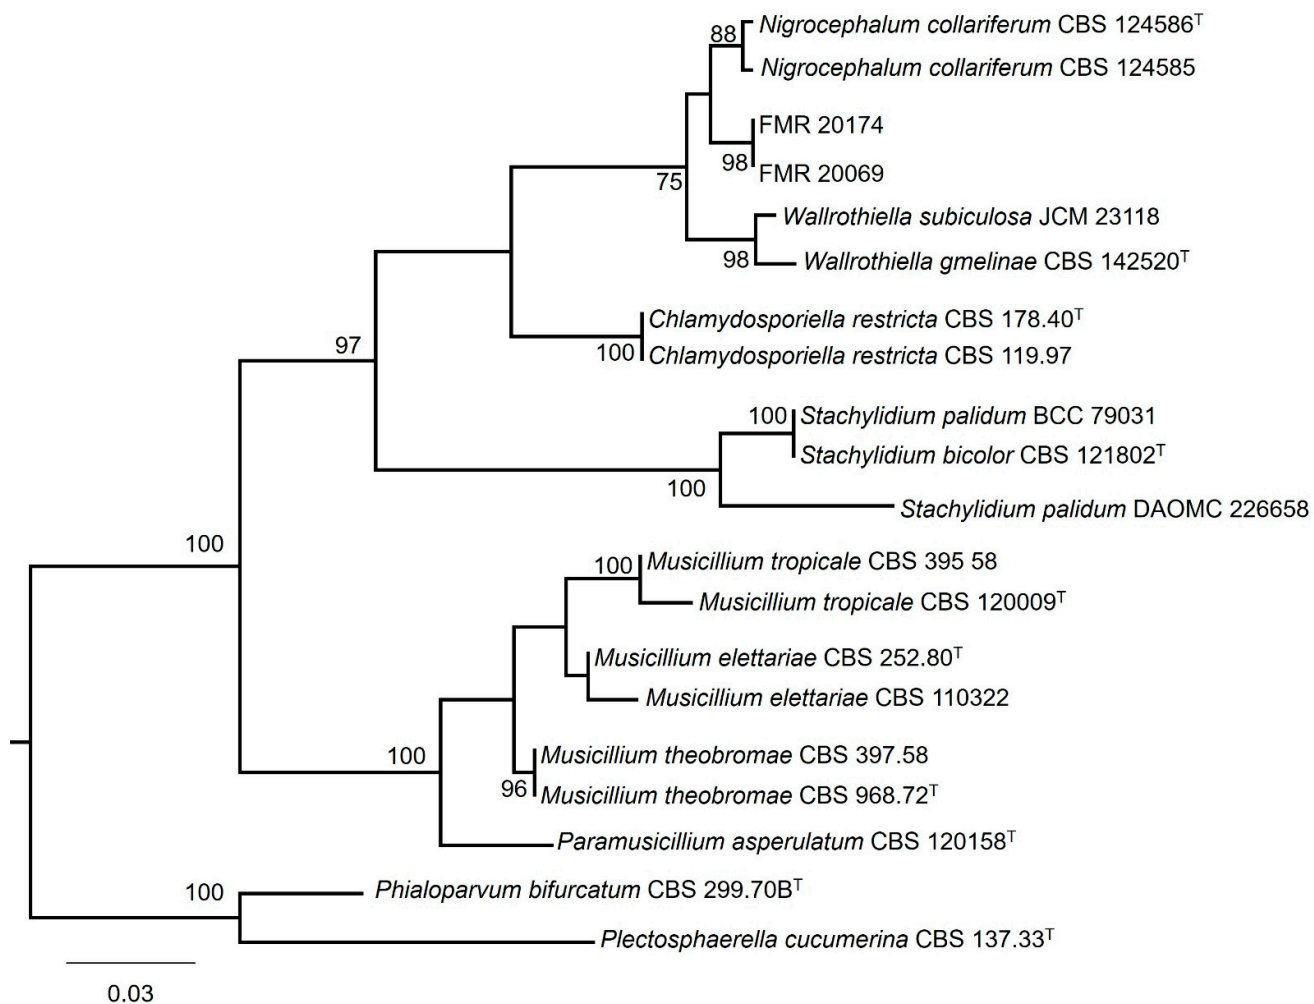

Figure S3: RaxML phylogenetic tree representing the individual ITS alignment of *Nigrocephalum* and representative species of *Plectosphaerellaceae*.

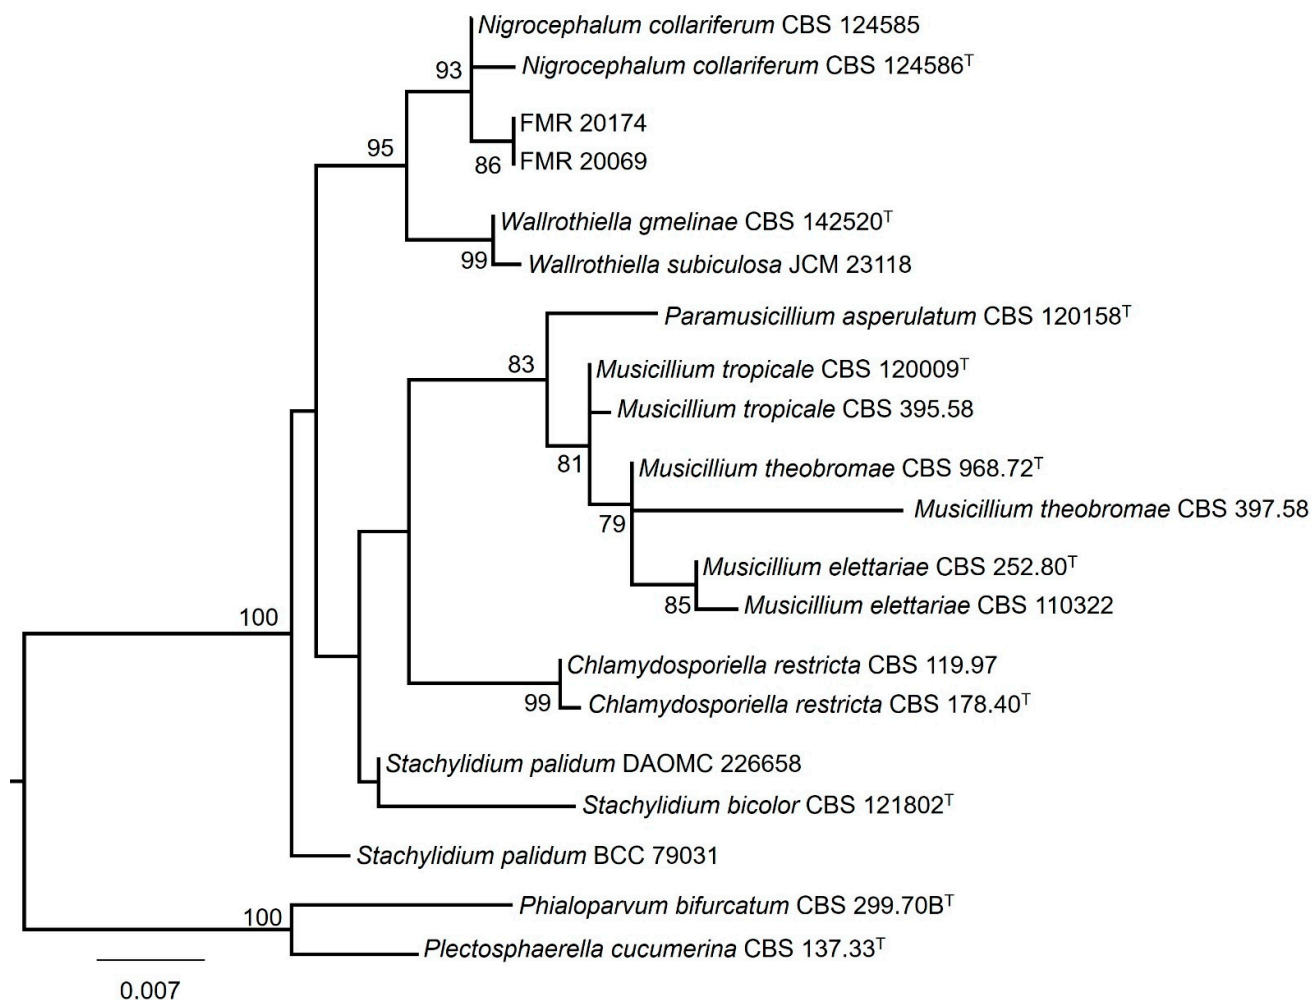

Figure S4: RaxML phylogenetic tree representing the individual LSU alignment of *Nigrocephalum* and representative species of *Plectosphaerellaceae*.

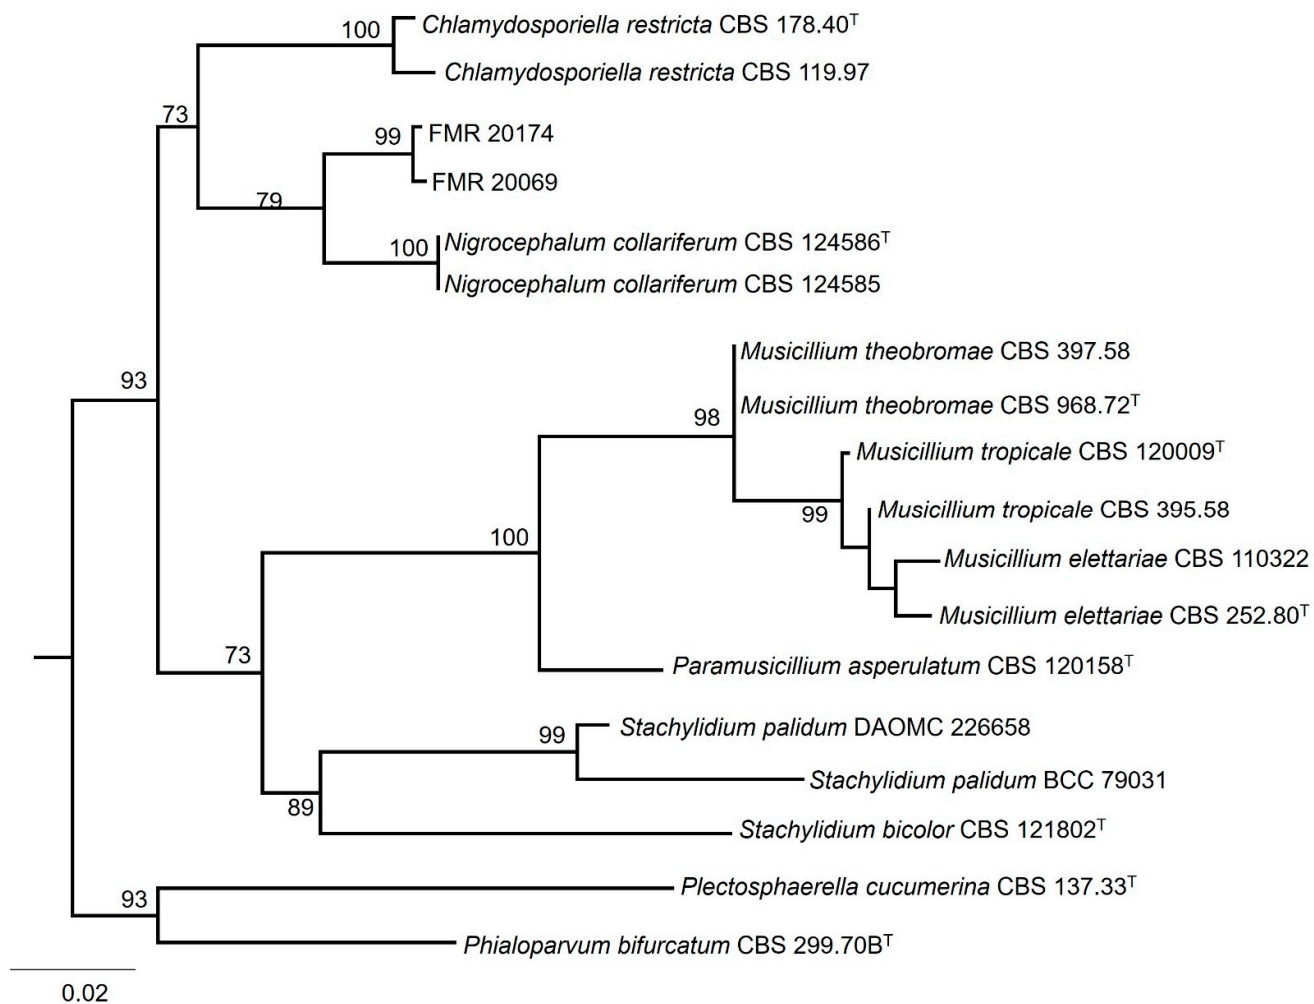

Figure S5: RaxML phylogenetic tree representing the individual *tef1-α* alignment of *Nigrocephalum* and representative species of *Plectosphaerellaceae*.

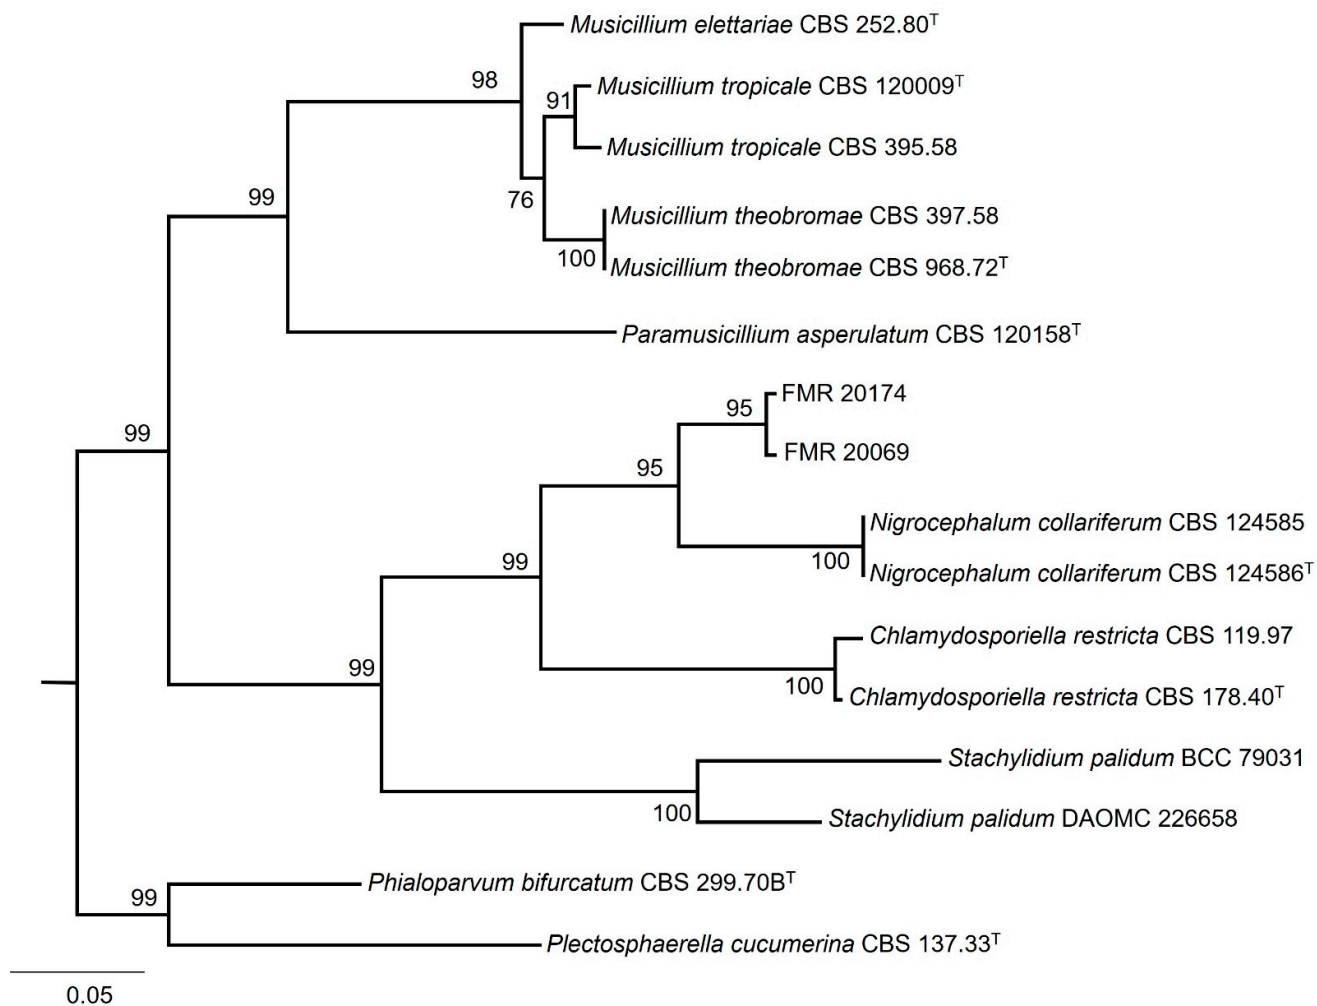

Figure S6: RaxML phylogenetic tree representing the individual *rpb2* alignment of *Nigrocephalum* and representative species of *Plectosphaerellaceae*.

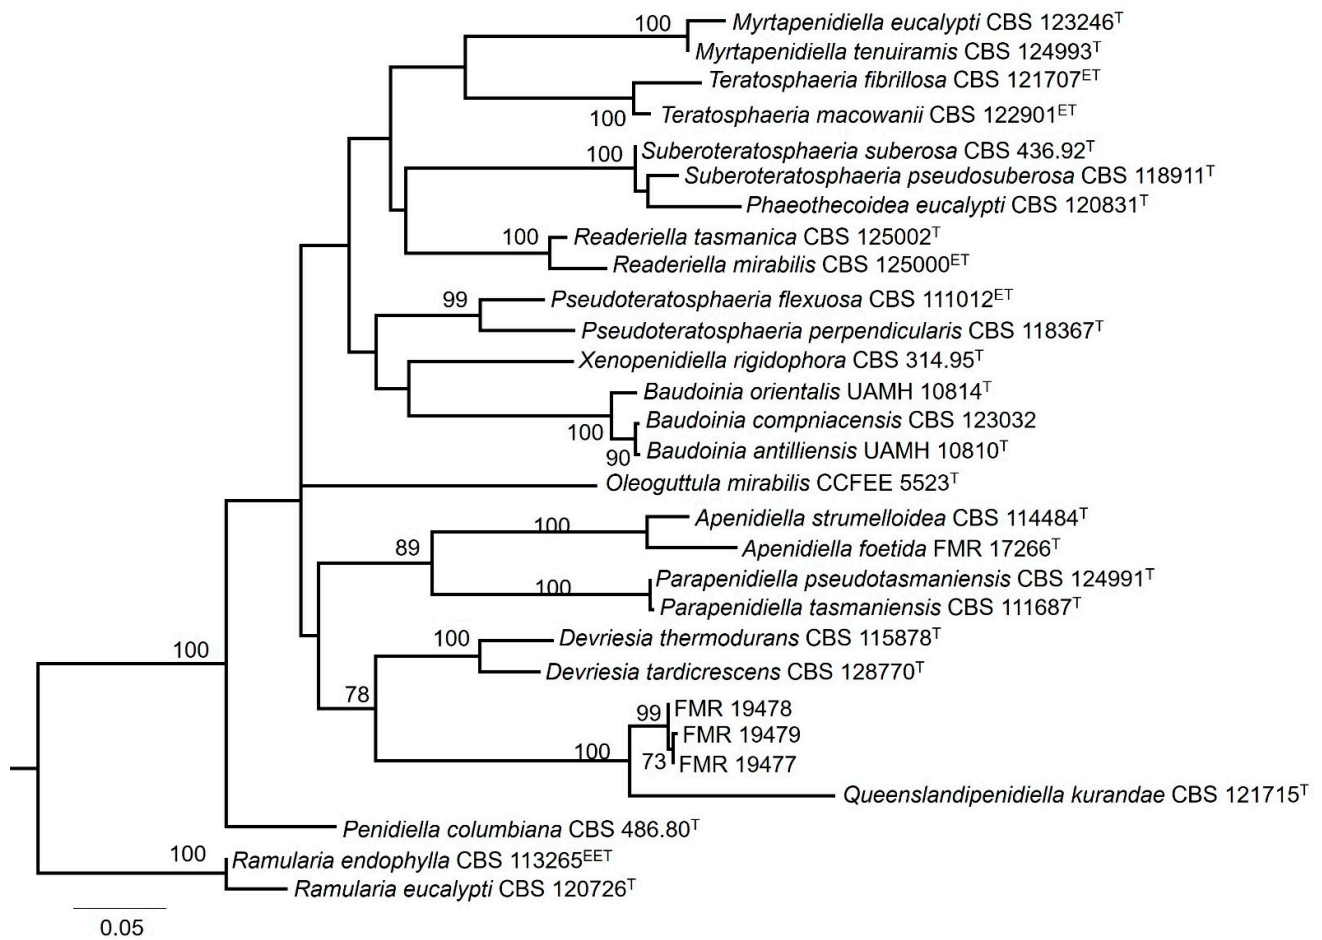

Figure S7: RaxML phylogenetic tree representing the individual ITS alignment of *Queenslandipenediella* and representative species of *Teratosphaeriaceae*.



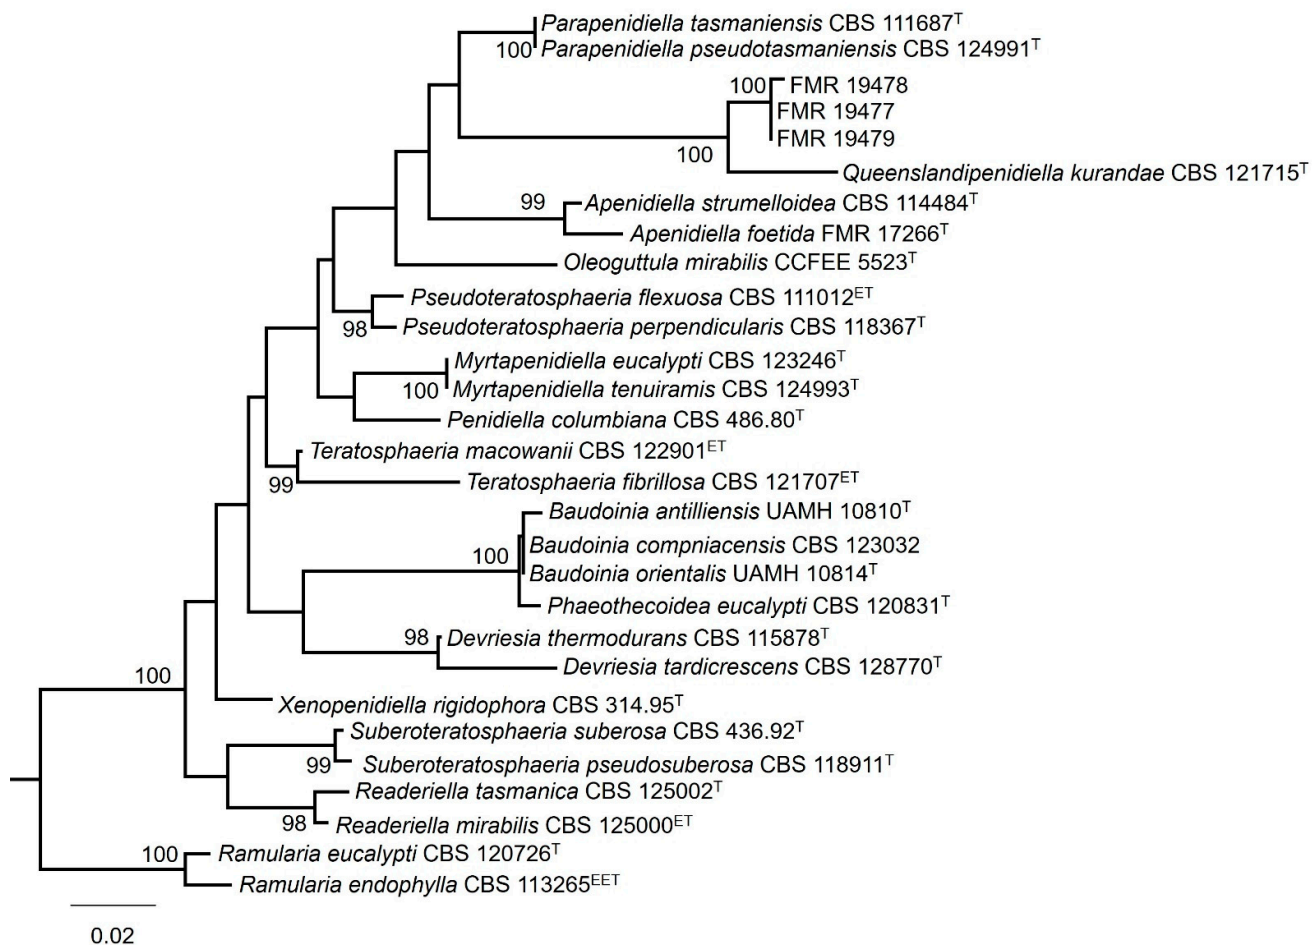

Figure S8: RaxML phylogenetic tree representing the individual LSU alignment of *Queenslandipenidiella* and representative species of *Teratosphaeriaceae*.



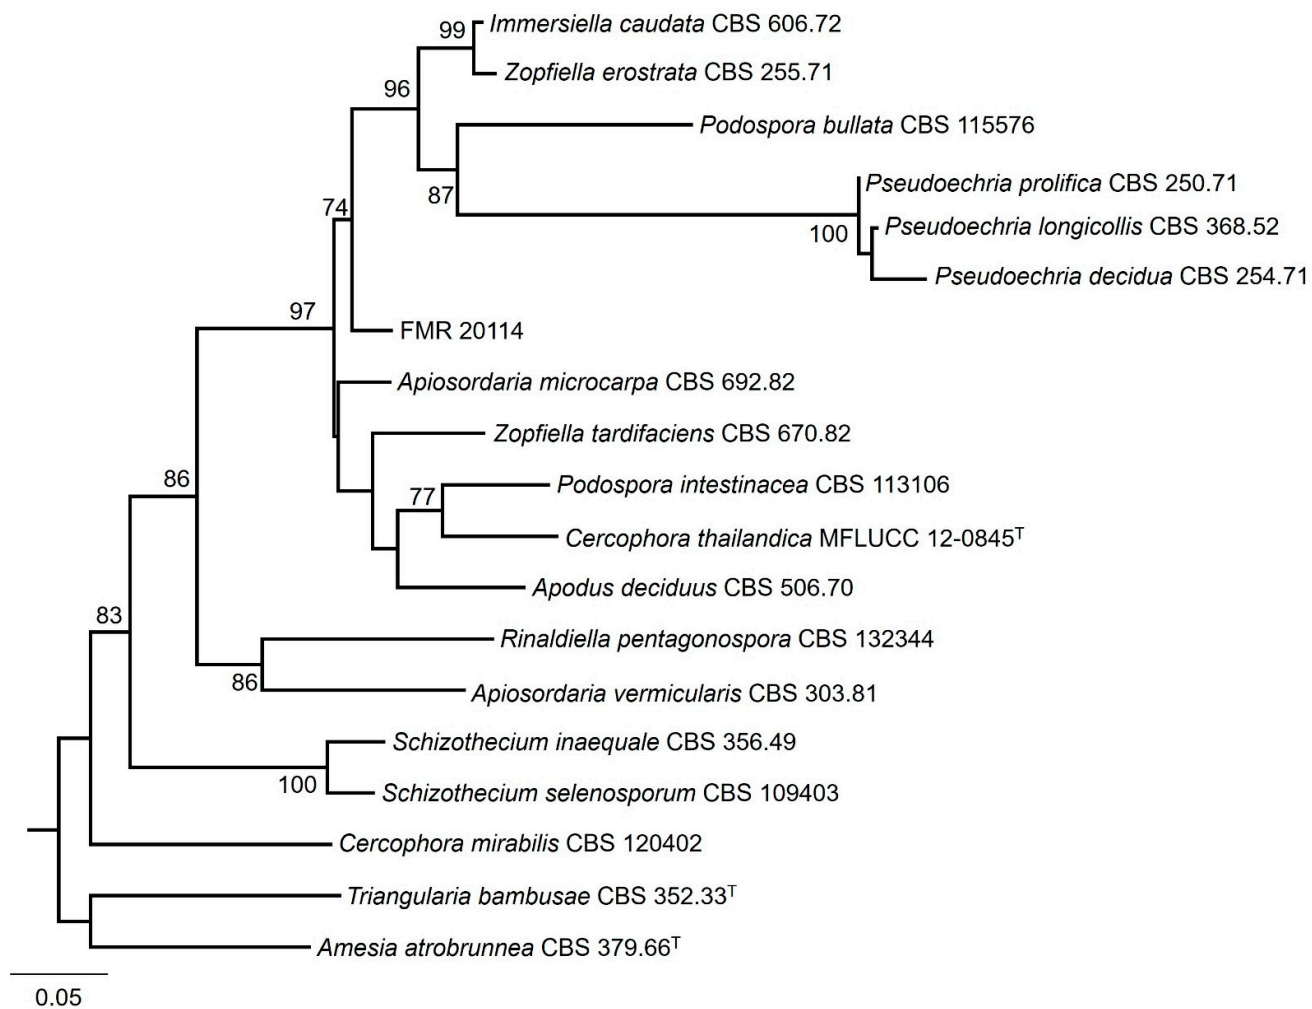

Figure S9: RaxML phylogenetic tree representing the individual ITS alignment of *Schizotheciaceae*.

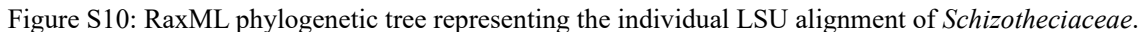

Figure S10: RaxML phylogenetic tree representing the individual LSU alignment of *Schizotheciaceae*.

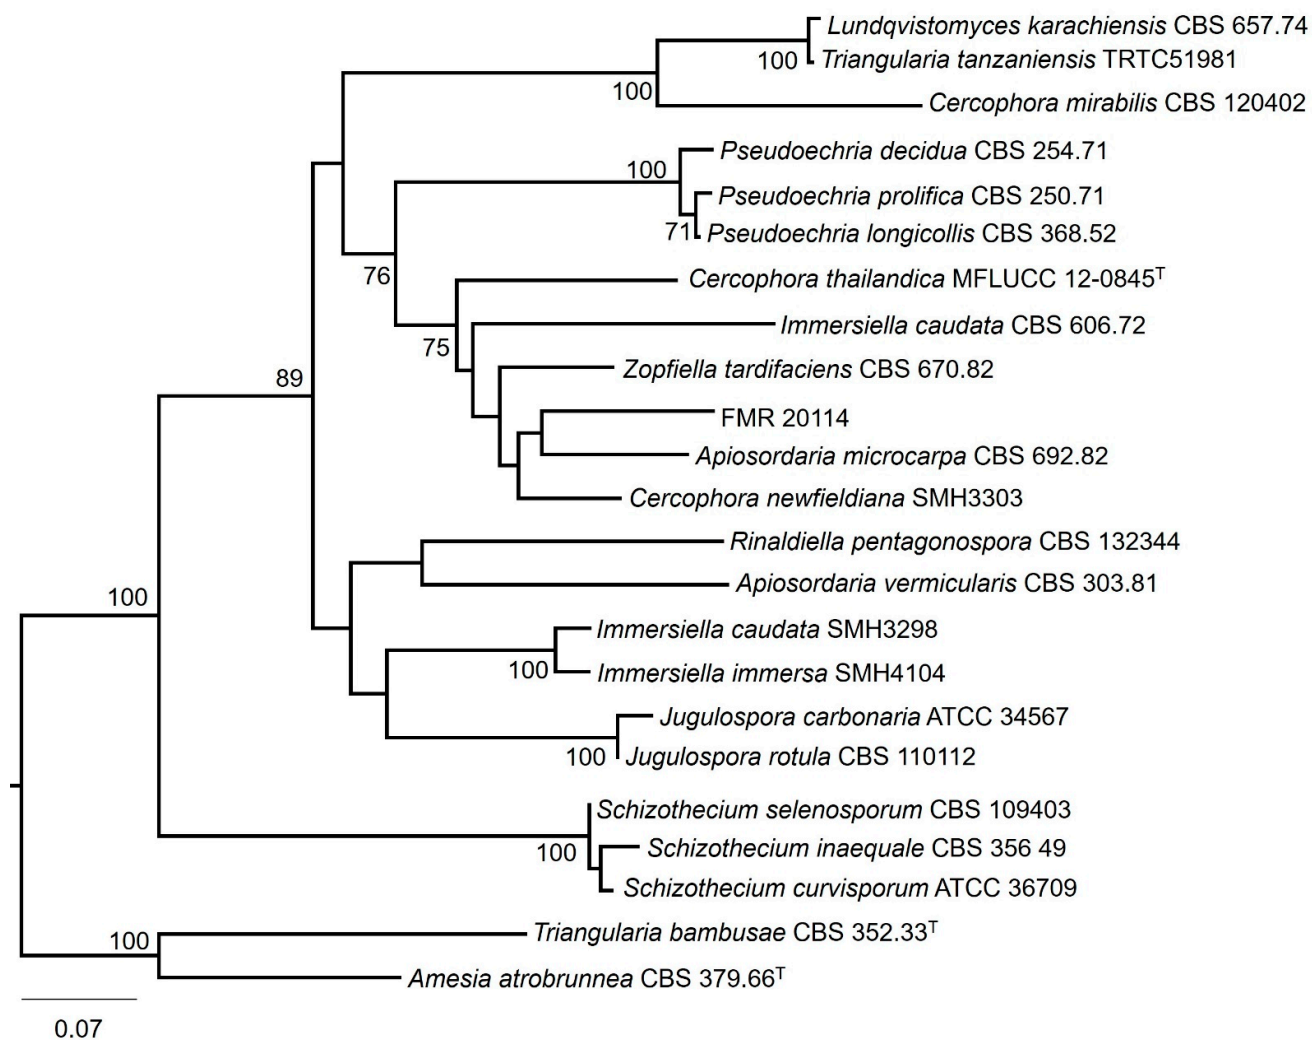

Figure S11: RaxML phylogenetic tree representing the individual *rpb2* alignment of *Schizotheciaceae*.

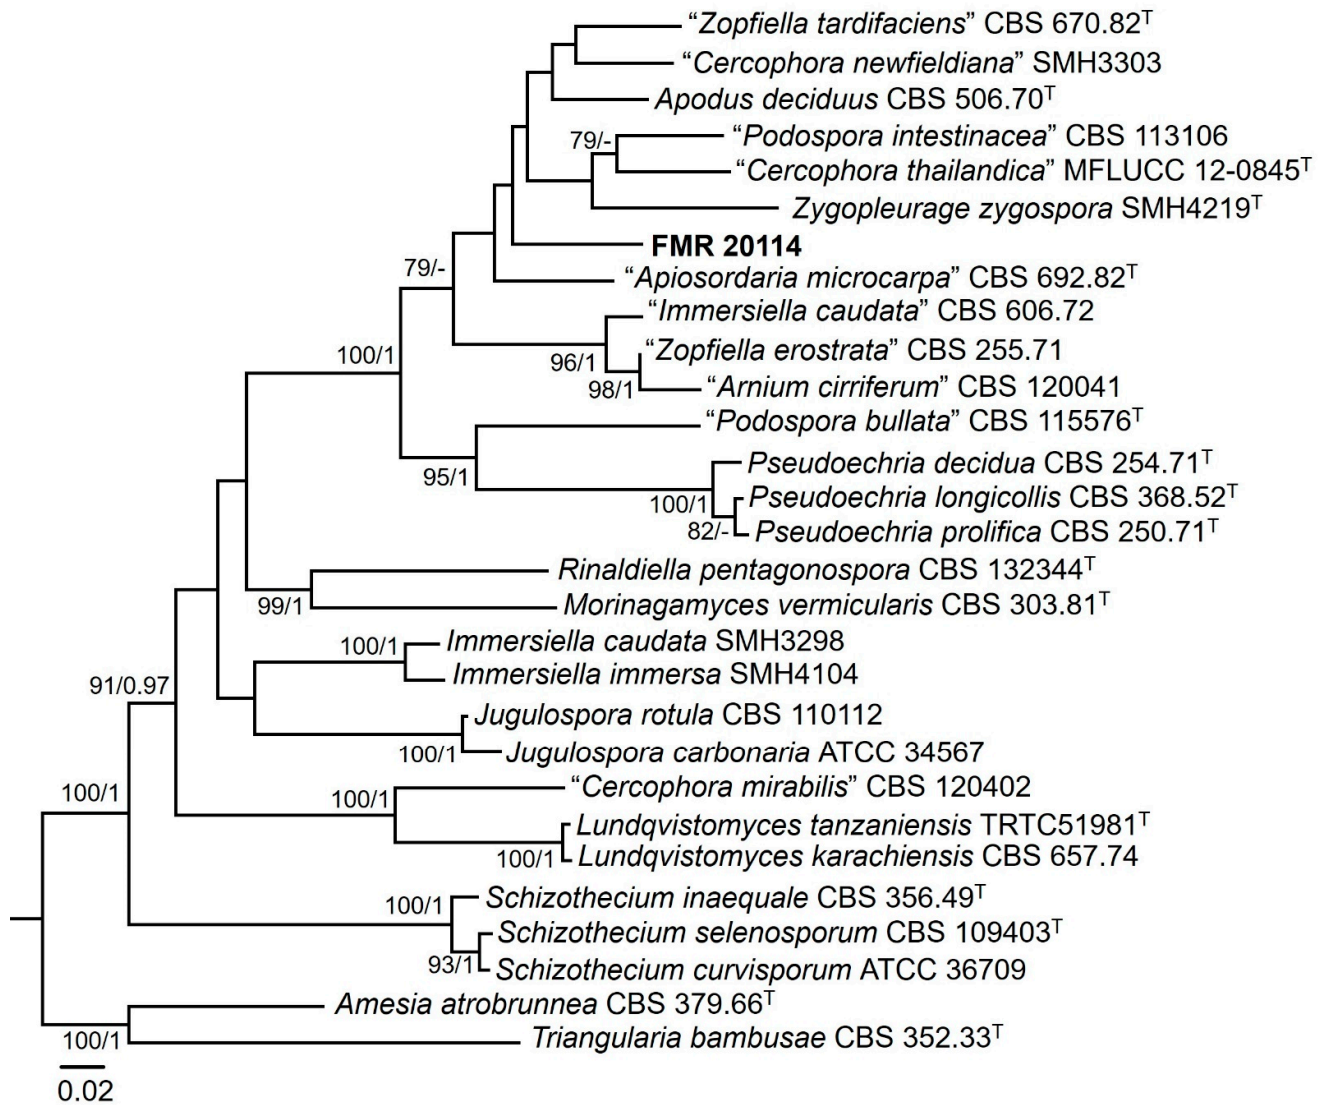

Figure S12: Phylogenetic tree inferred from a concatenated alignment of ITS, LSU and *rpb2* sequences of 28 strains representing *Schizotheciaceae*. Numbers at the branches indicate support values (RAxML-BS/ BI-PP) above 70%/0.95. The tree is rooted to *Amesia atrobrunnea* CBS 379.66 and *Triangularia bambusae* CBS 352.33. <sup>T</sup> indicates ex-type strains. Quote marks indicate strains with unresolved taxonomy. The scale bar represents the expected number of changes per site.
